# Supplementary material for: Prediction of ternary superconducting YCH12 using a novel solid hydrogen source under high pressure
Source: Royal Society of Chemistry journal article supplement (doi:10.1039/d2tc04029h), 2022-01-01
Supplement: d2tc04029h1.pdf [file d2tc04029h1.pdf]

## Supplementary Information

### Prediction of ternary superconducting $\text{YCH}_{12}$ by a novel solid hydrogen source under high pressure

Ge Fei<sup>a</sup>, Xin Chen<sup>a,b\*</sup>, Yunxian Liu<sup>a,b</sup> and Xiaobing Liu<sup>a,b\*</sup>

<sup>a</sup> Laboratory of High Pressure Physics and Material Science (HPPMS), School of Physics and Physical Engineering, Qufu Normal University, Qufu, Shandong, 273165, China

<sup>b</sup> Advanced Research Institute of Multidisciplinary Science, Qufu Normal University, Qufu, Shandong, 273165, China

\*Email: [chenxin@qfnu.edu.cn](mailto:chenxin@qfnu.edu.cn), [xiaobing.phy@qfnu.edu.cn](mailto:xiaobing.phy@qfnu.edu.cn)

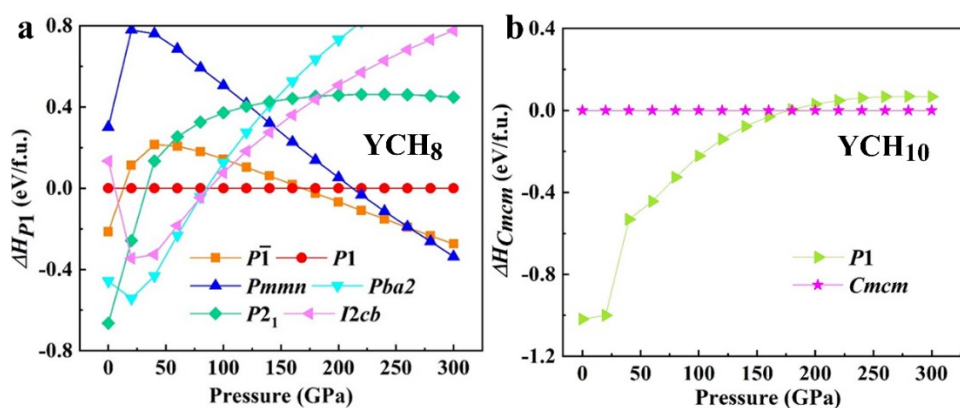

**Figure S1:** Relative enthalpy per formula unit referenced to the selected phases for  $\text{YCH}_8$  (a) and  $\text{YCH}_{10}$  (b).

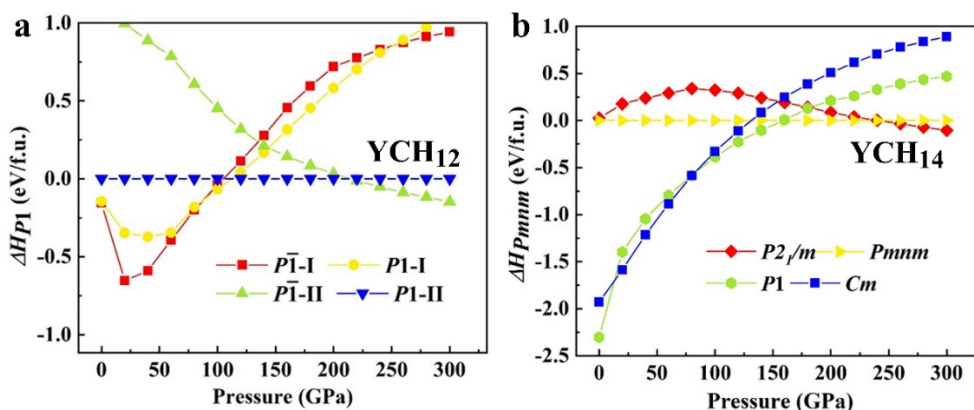

**Figure S2:** Relative enthalpy per formula unit referenced to the selected phases for  $\text{YCH}_{12}$  (a) and  $\text{YCH}_{14}$  (b).

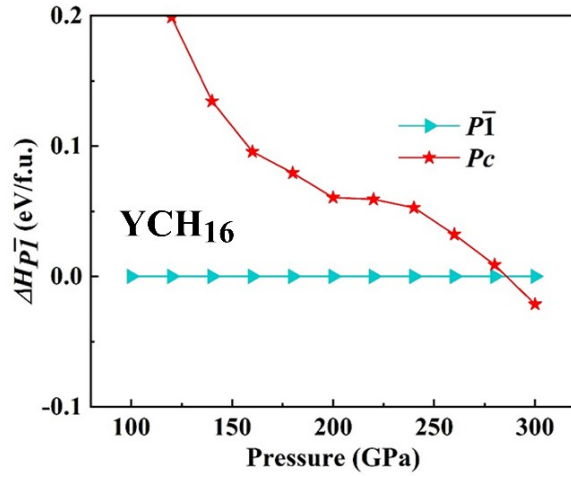

**Figure S3:** Relative enthalpy per formula unit referenced to the selected phases for  $YCH_{16}$ .

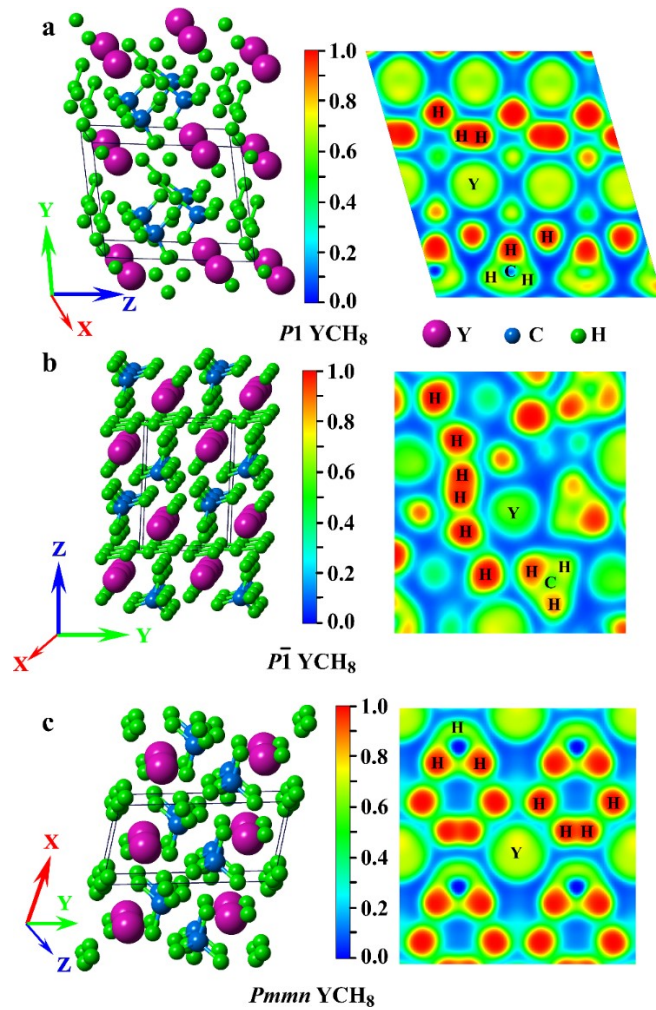

**Figure S4:** The predicted crystal features and the corresponding the electronic localization function (ELF) of  $YCH_8$ :  $P1$ -I at 100 GPa (a),  $P\bar{I}$ -I at 200 GPa (b),  $Pmmn$  at 280 GPa (c) The Y (pink), C (blue), H (green) atoms are represented by the colored spheres.

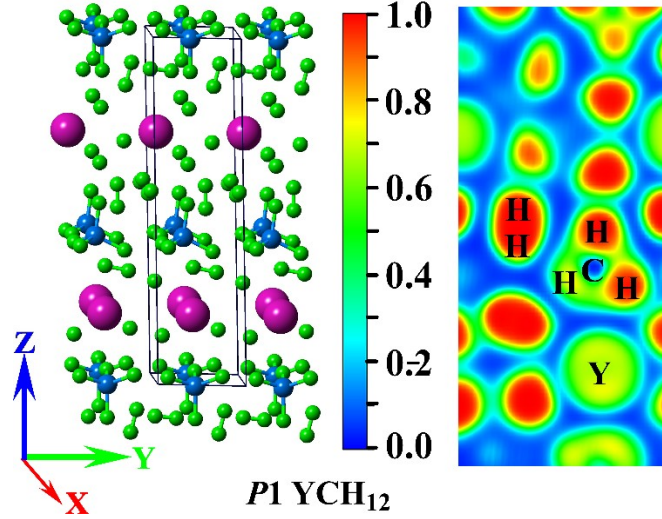

**Figure S5:** The predicted crystal features and the corresponding the electronic localization function (ELF) of YCH<sub>12</sub> P1-I at 100 GPa. The pink, blue, and green spheres represent Y, C, and H atoms, respectively.

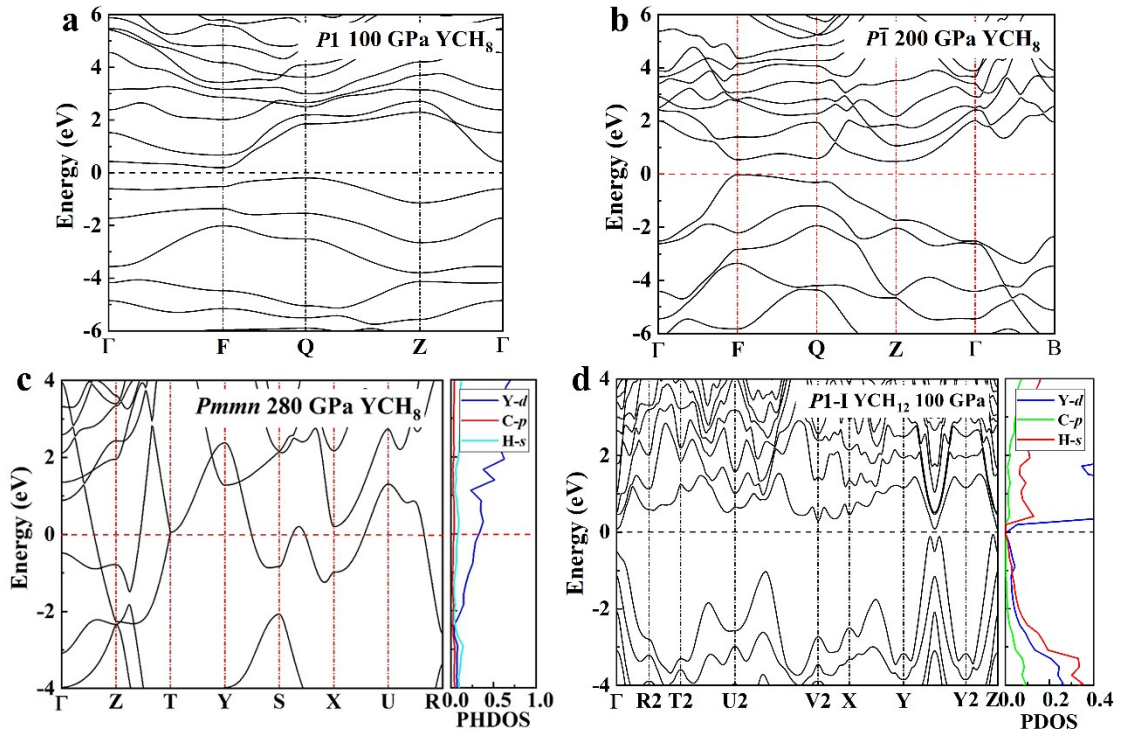

**Figure S6:** Calculated electronic band structure and projected density of states (PDOS) of YCH<sub>8</sub> P1-I at 100 GPa (a), P1-I at 200 GPa (b), Pmmn at 280 GPa (c) and YCH<sub>12</sub> P1-I at 100 GPa (d).

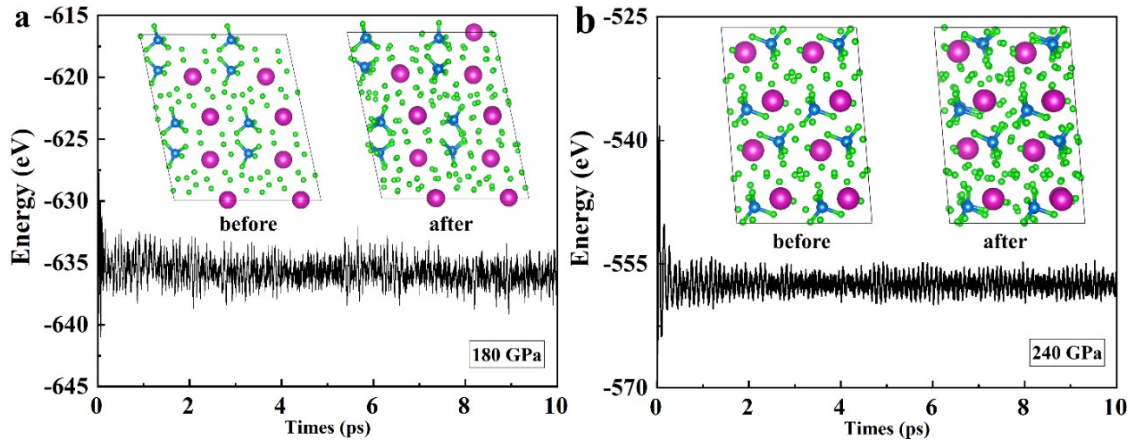

**Figure S7:** The variation of the free energy in the AIMD simulations over a timescale of 10 ps at 500 K in  $\text{YCH}_{12}$   $P1\text{-II}$  (a) and  $P1$  (b). The snapshots represent the structures at 0 and 10 ps.

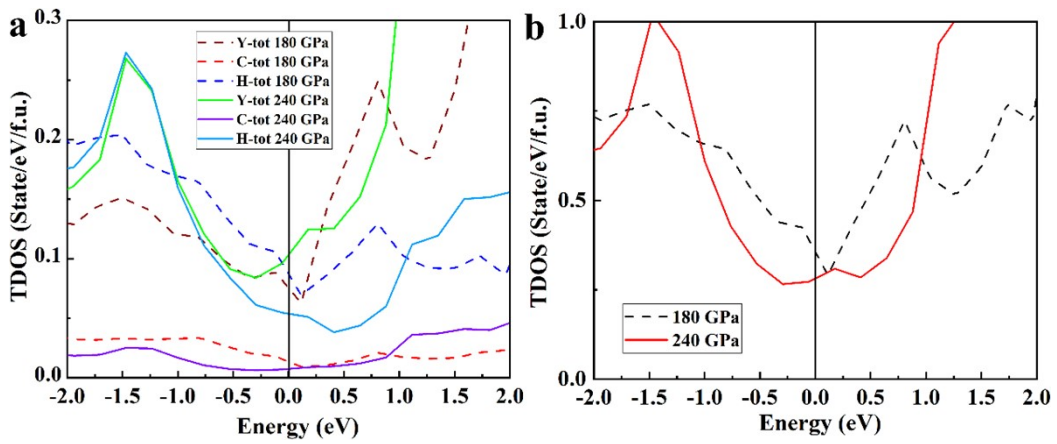

**Figure S8:** The total DOS of  $\text{YCH}_{12}$   $P1\text{-II}$  at 180 GPa and  $P1$  at 240 GPa.

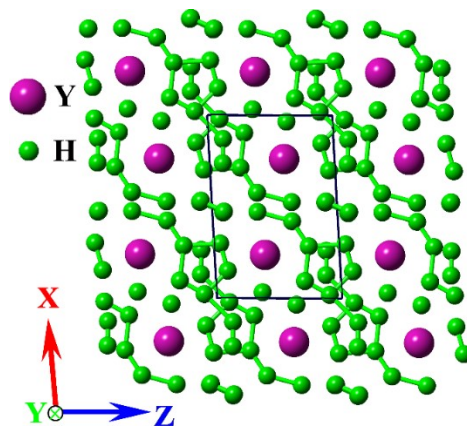

**Figure S9:** The crystal structure of  $\text{YH}_{12}$   $P2_1/m$  (remove the C from  $\text{YCH}_{12}$   $P1\text{-III}$  at 200 GPa) at 200 GPa.



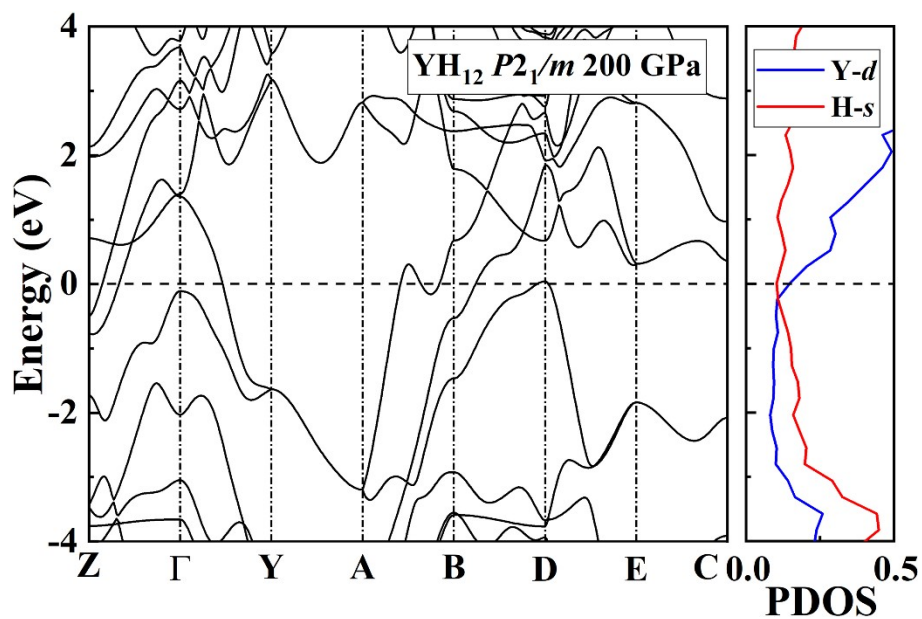

**Figure S10:** The calculated band structures and projected density of states (PDOS) of  $\text{YH}_{12}$   $P2_1/m$  (remove C atoms from  $\text{YCH}_{12}$   $P1$ -III) at 200 GPa.

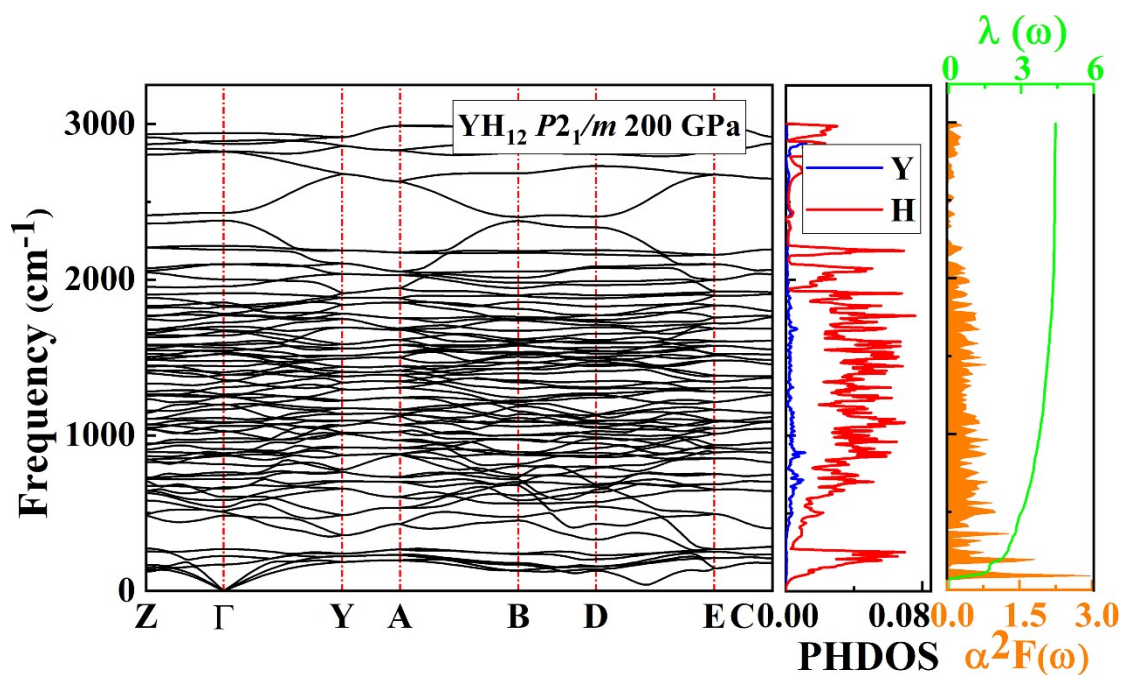

**Figure S11:** The calculated phonon dispersions, phonon density of states and Eliashberg phonon spectral function  $\alpha^2F(\omega)$  (b) of  $\text{YH}_{12}$   $P2_1/m$  (remove C atoms from  $\text{YCH}_{12}$   $P1$ -III) at 200 GPa.

**Table S1.** Structural information of the predicted stable phases.

| Compound         | Phase     | Pressure (GPa) | Lattice Parameters (Å)                 | Atomic Positions |          |          |
|------------------|-----------|----------------|----------------------------------------|------------------|----------|----------|
|                  |           |                |                                        | <i>x</i>         | <i>y</i> | <i>z</i> |
| YCH <sub>8</sub> | <i>P1</i> | 100            | a = 3.0527<br>b = 4.5188<br>c = 5.8836 | Y 0.9363         | 0.91455  | 0.24225  |
|                  |           |                |                                        | Y 0.34937        | 0.74612  | 0.79524  |
|                  |           |                |                                        | C 0.67187        | 0.34860  | 0.32096  |
|                  |           |                |                                        | C 0.09336        | 0.23653  | 0.65501  |
|                  |           |                |                                        | H 0.80895        | 0.25299  | 0.75341  |
|                  |           |                |                                        | H 0.19670        | 0.43348  | 0.52215  |
|                  |           |                |                                        | H 0.37180        | 0.25192  | 0.77086  |
|                  |           |                |                                        | H 0.02251        | 0.41560  | 0.25283  |
|                  |           |                |                                        | H 0.70044        | 0.49236  | 0.46041  |
|                  |           |                |                                        | H 0.48651        | 0.41397  | 0.17815  |
|                  |           |                |                                        | H 0.95285        | 0.31987  | 0.00232  |
|                  |           |                |                                        | H 0.81934        | 0.68450  | 0.59423  |
|                  |           |                |                                        | H 0.32563        | 0.68662  | 0.12404  |
|                  |           |                |                                        | H 0.21389        | 0.30540  | 0.00596  |
|                  |           |                |                                        | H 0.36523        | 0.77390  | 0.44623  |
|                  |           |                |                                        | H 0.71954        | 0.48349  | 0.91653  |
| H 0.98880        | 0.01248   | 0.58549        |                                        |                  |          |          |
| H 0.53515        | 0.11824   | 0.42400        |                                        |                  |          |          |
| H 0.51323        | 0.08293   | 0.01309        |                                        |                  |          |          |

|                  |            |         |            |           |         |         |
|------------------|------------|---------|------------|-----------|---------|---------|
|                  |            |         |            | H 0.92801 | 0.90533 | 0.93688 |
| YCH <sub>8</sub> | $P\bar{1}$ | 200     | a = 2.8629 | Y 0.50971 | 0.76255 | 0.80226 |
|                  |            |         | b = 3.9675 | Y 0.49029 | 0.23745 | 0.19774 |
|                  |            |         |            | C 0.28324 | 0.19462 | 0.62533 |
|                  |            |         | c = 5.8469 | C 0.71676 | 0.80538 | 0.37467 |
|                  |            |         |            | H 0.98864 | 0.40479 | 0.36407 |
|                  |            |         |            | H 0.01136 | 0.59520 | 0.6359  |
|                  |            |         |            | H 0.66436 | 0.31018 | 0.63863 |
|                  |            |         |            | H 0.33565 | 0.68982 | 0.36137 |
|                  |            |         |            | H 0.62220 | 0.24863 | 0.88540 |
|                  |            |         |            | H 0.37780 | 0.75137 | 0.11460 |
|                  |            |         |            | H 0.19928 | 0.92580 | 0.57440 |
|                  |            |         |            | H 0.80072 | 0.07420 | 0.42560 |
|                  |            |         |            | H 0.18567 | 0.35288 | 0.50978 |
|                  |            |         |            | H 0.81433 | 0.64712 | 0.49022 |
|                  |            |         |            | H 0.96747 | 0.89005 | 0.00934 |
|                  |            |         |            | H 0.03252 | 0.10994 | 0.99066 |
|                  |            |         |            | H 0.14870 | 0.39489 | 0.01433 |
|                  |            |         |            | H 0.85130 | 0.60511 | 0.98567 |
|                  | H 0.97008  | 0.75803 | 0.21609    |           |         |         |
|                  | H 0.02992  | 0.24197 | 0.7839     |           |         |         |

---

|                  |             |     |            |           |         |         |
|------------------|-------------|-----|------------|-----------|---------|---------|
|                  |             |     | a = 2.7374 | Y 0.50000 | 0.00000 | 0.19560 |
| YCH <sub>8</sub> | <i>Pmmn</i> | 280 |            | Y 0.00000 | 0.50000 | 0.80441 |
|                  |             |     | b = 4.0892 | C 0.50000 | 0.50000 | 0.44942 |
|                  |             |     | c = 4.8453 | C 0.00000 | 0.00000 | 0.55059 |
|                  |             |     |            | H 0.00000 | 0.89977 | 0.94906 |
|                  |             |     |            | H 0.00000 | 0.10023 | 0.94906 |
|                  |             |     |            | H 0.50000 | 0.39977 | 0.05094 |
|                  |             |     |            | H 0.50000 | 0.60023 | 0.05094 |
|                  |             |     |            | H 0.00000 | 0.68689 | 0.15719 |
|                  |             |     |            | H 0.00000 | 0.31311 | 0.15719 |
|                  |             |     |            | H 0.50000 | 0.18689 | 0.84281 |
|                  |             |     |            | H 0.50000 | 0.81311 | 0.84281 |
|                  |             |     |            | H 0.00000 | 0.21037 | 0.42087 |
|                  |             |     |            | H 0.00000 | 0.78963 | 0.42087 |
|                  |             |     |            | H 0.50000 | 0.71037 | 0.57913 |
|                  |             |     |            | H 0.50000 | 0.28963 | 0.57913 |
|                  |             |     |            | H 0.21452 | 0.50000 | 0.30504 |
|                  |             |     |            | H 0.78549 | 0.50000 | 0.30504 |
|                  |             |     |            | H 0.28549 | 0.00000 | 0.69497 |
|                  |             |     |            | H 0.71452 | 0.00000 | 0.69497 |
|                  |             |     |            |           |         |         |
|                  |             |     | a = 3.0923 | Y 0.72027 | 0.04357 | 0.71931 |
|                  |             |     |            | Y 0.08840 | 0.39487 | 0.20541 |

---



---

|                   |      |     |             |            |         |         |
|-------------------|------|-----|-------------|------------|---------|---------|
|                   |      |     | b = 3.1393  | C 0.04772  | 0.41686 | 0.99934 |
| YCH <sub>12</sub> | P1-I | 100 | c = 11.3007 | C 0.17792  | 0.29299 | 0.43183 |
|                   |      |     |             | H 0.37808  | 0.73752 | 0.84093 |
|                   |      |     |             | H 0.77358  | 0.98146 | 0.90176 |
|                   |      |     |             | H 0.37571  | 0.71082 | 0.67942 |
|                   |      |     |             | H 0.54672  | 0.61117 | 0.56013 |
|                   |      |     |             | H -0.00142 | 0.95204 | 0.55748 |
|                   |      |     |             | H 0.05520  | 0.37046 | 0.63790 |
|                   |      |     |             | H 0.71070  | 0.44349 | 0.03049 |
|                   |      |     |             | H 0.40412  | 0.74567 | 0.14141 |
|                   |      |     |             | H 0.73699  | 0.07833 | 0.13245 |
|                   |      |     |             | H 0.02271  | 0.06980 | 0.40686 |
|                   |      |     |             | H 0.99316  | 0.64374 | 0.38516 |
|                   |      |     |             | H 0.55857  | 0.09018 | 0.41349 |
|                   |      |     |             | H 0.79934  | 0.99707 | 0.29122 |
|                   |      |     |             | H 0.57614  | 0.45791 | 0.32586 |
|                   |      |     |             | H 0.44450  | 0.73194 | 0.30825 |
|                   |      |     |             | H 0.02916  | 0.41444 | 0.90367 |
|                   |      |     |             | H 0.08683  | 0.72370 | 0.02931 |
|                   |      |     |             | H 0.36774  | 0.08032 | 0.03243 |
|                   |      |     |             | H 0.15538  | 0.34748 | 0.52559 |
|                   |      |     |             | H 0.53051  | 0.61102 | 0.49418 |

---

|                   |       |     |            |           |         |          |
|-------------------|-------|-----|------------|-----------|---------|----------|
|                   |       |     |            | H 0.76813 | 0.94309 | 0.54258' |
|                   |       |     |            | H 0.59179 | 0.23940 | 0.89063  |
|                   |       |     |            | H 0.05171 | 0.39198 | 0.79715  |
|                   |       |     |            | H 0.34356 | 0.81183 | 0.90530  |
|                   |       |     | a = 2.7812 | Y 0.53522 | 0.72728 | 0.00807  |
| YCH <sub>12</sub> | P1-II | 180 | b = 4.9524 | Y 0.03076 | 0.60316 | 0.49184  |
|                   |       |     | c = 5.7184 | C 0.51812 | 0.23214 | 0.93266  |
|                   |       |     |            | C 0.03245 | 0.14510 | 0.56716  |
|                   |       |     |            | H 0.53129 | 0.50161 | 0.25675  |
|                   |       |     |            | H 0.53343 | 0.52356 | 0.69148  |
|                   |       |     |            | H 0.03709 | 0.53401 | 0.82210  |
|                   |       |     |            | H 0.02733 | 0.53491 | 0.14531  |
|                   |       |     |            | H 0.53061 | 0.35184 | 0.34243  |
|                   |       |     |            | H 0.27601 | 0.30506 | 0.64919  |
|                   |       |     |            | H 0.74966 | 0.35230 | 0.84265  |
|                   |       |     |            | H 0.05369 | 0.33792 | 0.18875  |
|                   |       |     |            | H 0.04863 | 0.01171 | 0.12107  |
|                   |       |     |            | H 0.03997 | 0.00462 | 0.97937  |
|                   |       |     |            | H 0.53495 | 0.90414 | 0.55730  |
|                   |       |     |            | H 0.64248 | 0.99229 | 0.30464  |
|                   |       |     |            | H 0.64335 | 0.22218 | 0.10091  |
|                   |       |     |            | H 0.17089 | 0.31290 | 0.94273  |

---

|                   |            |     |            |           |         |          |
|-------------------|------------|-----|------------|-----------|---------|----------|
|                   |            |     |            | H 0.69334 | 0.22564 | 0.53482' |
|                   |            |     |            | H 0.16668 | 0.02095 | 0.40941  |
|                   |            |     |            | H 0.51011 | 0.10954 | 0.26093  |
|                   |            |     |            | H 0.51271 | 0.04272 | 0.81283  |
|                   |            |     |            | H 0.00537 | 0.02859 | 0.70340  |
|                   |            |     |            | H 0.04721 | 0.23237 | 0.27421  |
|                   |            |     |            | H 0.52794 | 0.77135 | 0.33829  |
|                   |            |     |            | H 0.53080 | 0.83177 | 0.67716  |
|                   |            |     |            | H 0.02427 | 0.84072 | 0.79630  |
|                   |            |     |            | H 0.04563 | 0.81940 | 0.24828  |
|                   |            |     |            | <hr/>     |         |          |
|                   |            |     | a = 3.6903 | Y 0.84186 | 0.67659 | 0.25322  |
| YCH <sub>12</sub> | $P\bar{1}$ | 240 | b = 4.0333 | Y 0.15814 | 0.32341 | 0.74678  |
|                   |            |     | c = 5.3018 | C 0.51342 | 0.28150 | 0.16385  |
|                   |            |     |            | C 0.48658 | 0.71850 | 0.83615  |
|                   |            |     |            | H 0.70275 | 0.50057 | 0.51499  |
|                   |            |     |            | H 0.29725 | 0.49943 | 0.48501  |
|                   |            |     |            | H 0.00379 | 0.76159 | 0.96408  |
|                   |            |     |            | H 0.99621 | 0.23841 | 0.03592  |
|                   |            |     |            | H 0.62394 | 0.32083 | 0.57452  |
|                   |            |     |            | H 0.37606 | 0.67917 | 0.42548  |
|                   |            |     |            | H 0.33217 | 0.20490 | 0.26044  |
|                   |            |     |            | H 0.66783 | 0.79510 | 0.73956  |

---

---

|           |         |         |
|-----------|---------|---------|
| H 0.92306 | 0.99234 | 0.54152 |
| H 0.07694 | 0.00766 | 0.45848 |
| H 0.90919 | 0.96446 | 0.85893 |
| H 0.09081 | 0.03554 | 0.14107 |
| H 0.74621 | 0.26547 | 0.31573 |
| H 0.25379 | 0.73453 | 0.68428 |
| H 0.65021 | 0.09121 | 0.01310 |
| H 0.34979 | 0.90879 | 0.98690 |
| H 0.34024 | 0.55146 | 0.09294 |
| H 0.65976 | 0.44854 | 0.90706 |
| H 0.75238 | 0.14101 | 0.77226 |
| H 0.24762 | 0.85899 | 0.22774 |
| H 0.90229 | 0.75475 | 0.60899 |
| H 0.09771 | 0.24525 | 0.39101 |
| H 0.45848 | 0.91596 | 0.49380 |
| H 0.54152 | 0.08404 | 0.50620 |

---

**Table S2.** The calculated superconducting transition temperature  $T_c$  with correction factors for  $\text{YCH}_{12}$   $P1\text{-II}$  and  $P\bar{1}$  phases under various  $\mu^*$

| Pressure<br>(GPa) | $\mu^*$ | 0.08 | 0.10 | 0.13 |
|-------------------|---------|------|------|------|
|                   | 160     |      | 89   | 84   |
| 180               |         | 108  | 112  | 101  |
| 200               |         | 108  | 104  | 98   |
| 220               |         | 41   | 37   | 26   |
| 240               |         | 94   | 86   | 74   |
| 300               |         | 44   | 37   | 28   |
